1 Inhibition of fatty acid oxidation as a new target to treat Primary Amoebic

2 Meningoencephalitis by repurposing two well-known drugs

3

4 Maarten J. Sarink,<sup>a</sup> Annelies Verbon,<sup>a</sup> Aloysius G.M. Tielens,<sup>a,b</sup> Jaap J. van Hellemond<sup>a,#</sup>

5

6 <sup>a</sup>Department of Medical Microbiology and Infectious Diseases, Erasmus MC University

7 Medical Center Rotterdam

8 <sup>b</sup>Department of Biochemistry and Cell Biology, Faculty of Veterinary Medicine, Utrecht

9 University

10

11 Running head: Fatty acid oxidation inhibitors as a new PAM treatment

12

13 #Address correspondence to Jaap J. van Hellemond, [j.vanhellemond@erasmusmc.nl](mailto:j.vanhellemond@erasmusmc.nl)

14 **Abstract**

15 Primary Amoebic Meningoencephalitis (PAM) is a rapidly fatal infection caused by the free-  
16 living amoeba *Naegleria fowleri*. The disease mostly affects healthy children and young  
17 adults after contaminated water enters the nose, generally during recreational water activities.  
18 The amoeba migrate along the olfactory nerve to the brain, resulting in seizures, coma and  
19 eventually death. Previous research has shown that *Naegleria gruberi*, a close relative of *N.*  
20 *fowleri*, prefers lipids over glucose as an energy source. Therefore, we tested several  
21 inhibitors of fatty acid oxidation alongside the currently used drugs amphotericin B and  
22 miltefosine. Our data demonstrate that etomoxir, orlistat, perhexiline, thioridazine and  
23 valproic acid inhibited growth of *N. gruberi*. Furthermore, additive effects were seen when  
24 drugs were combined. Both thioridazine and valproic acid inhibit in vitro growth of *N.*  
25 *gruberi* in concentrations that can be obtained at the site of infection, which is doubtful with  
26 the currently used drugs amphotericin B and miltefosine. Both thioridazine and valproic acid  
27 have already been used for other diseases. As the development of new drugs and randomized  
28 controlled trials for this rare disease is nearly impossible, repurposing drugs is the most  
29 promising way to obtain additional drugs to combat PAM. Thioridazine and valproic acid are  
30 available drugs without major side-effects and can, therefore, be used as new complementary  
31 options in PAM therapy.

## 32 **Introduction**

33 The amoeba *Naegleria fowleri* causes Primary Amoebic Meningoencephalitis (PAM), a  
34 rapidly fatal disease of the central nervous system (CNS) (1-3). *N. fowleri* is one of the three  
35 most common free-living amoebae that can infect humans, the others being *Acanthamoeba*  
36 spp. and *Balamuthia mandrillaris*. These amoebae are ubiquitously present, with *N. fowleri*  
37 reported on all continents, except Antarctica (4). *N. fowleri* infections occur mostly in healthy  
38 children and young adults during recreational water activities, such as swimming, diving and  
39 rafting (5, 6). When water containing *N. fowleri* makes contact with the nasal epithelium, the  
40 trophozoite stage of the amoeba can migrate along the olfactory nerve, through the cribriform  
41 plate to the olfactory bulb within the CNS (2, 3, 7). Once inside the brain, the trophozoites  
42 will cause necrosis and acute inflammation, ultimately leading to death in over 95% of the  
43 cases (1, 3). There is concern that global warming and changes in the ecosystems that *N.*  
44 *fowleri* inhabits, may lead to more cases worldwide (8, 9). A wide range of antifungals and  
45 antibiotics have been used to treat PAM with varying degrees of effectivity. Most evidence is  
46 available for Amphotericin B (AMB) and Miltefosine (MIL), but because of the high  
47 mortality rate, more effective drugs are urgently needed (10).

48 Inhibition of metabolic processes essential to microorganisms is a fruitful strategy for  
49 the development of effective drugs (11). Several widely used drugs target the metabolism of  
50 the pathogen to exert their killing effect, such as the antimalarials atovaquone and proguanil,  
51 and the broad-spectrum antihelminthic and antiprotozoal nitazoxanide (12, 13).

52 Previous research by our group showed that *N. gruberi*, a close relative to *N. fowleri*,  
53 prefers fatty acids as a food source (14). This led us to the hypothesis that inhibiting fatty acid  
54 oxidation (FAO) could inhibit growth or even kill the amoeba. We identified several drugs  
55 that inhibit fatty acid metabolism in different parts of this pathway. As the metabolic  
56 machinery of *N. gruberi* is highly similar to that of *N. fowleri* (14-16), we used *N. gruberi* as a

57 model organism to determine the effects of these compounds. We then compared the effects  
58 of these inhibitors to the currently used treatment (AMB and MIL) and determined additive  
59 effects of the compounds when they were combined.

60

## 61 **Materials and Methods**

62 **Chemicals and amoeba culture.** *N. gruberi* strain NEG-M (ATCC® 30224) was grown  
63 axenically at 25 °C in modified PYNFH medium (ATCC medium 1034), as described before  
64 (14). Modified PYNFH is composed of peptone, yeast extract, yeast nucleic acid, folic acid,  
65 10% heat-inactivated fetal bovine serum, 100 units/ml penicillin, 100 µg/ml streptomycin and  
66 40 µg/ml gentamicin. All experiments were performed using trophozoites harvested during  
67 the logarithmic phase of growth. Amphotericin B (AMB), etomoxir (ETO), miltefosine  
68 (MIL), thioridazine (TDZ), orlistat (ORL), perhexiline (PHX) and valproic acid (VPA) were  
69 purchased from Sigma. Translucent 96 wells plates were purchased from Greiner Bio-One.

70 **Growth curves.** To determine the effects of fatty acid oxidation inhibitors and current  
71 therapies for PAM, 96-well plates were inoculated with  $1 \times 10^4$  *N. gruberi* trophozoites in  
72 PYNFH per well. Compounds were tested per plate in triplicate in at least two independent  
73 experiments; controls contained equivalent concentrations of compound solvents (water,  
74 PYNFH or DMSO). Optical Density (OD) measurements of the 96 wells were performed  
75 every 24 hours using a FLUOstar OPTIMA microplate reader. Regrowth capacity was  
76 assessed by collecting contents of the wells at day 5, followed by washing three times with  
77 PYNFH to remove the inhibitors, after which the samples were added to a new plate. Controls  
78 were diluted 10x to allow proper detection of regrowth in these relatively densely populated  
79 amoeba samples.

80 **Imaging of amoeba.** In selected combination experiments, images were taken with an  
81 Olympus XY51 phase-contrast microscope on day 0, day 5 (both before and after washing)

82 and on day 14 of experiments and were analysed using Cell<sup>^</sup>F software (Olympus). To  
83 visualize activity of the amoeba, movies were recorded on day 14, with 1 frame every 2  
84 seconds for a total time of 1 minute.

85 **Data analysis.** GraphPad Prism 7 was used to process data. Graphs of separate wells  
86 were constructed with OD values on Y-axis, time (days) on X-axis. Area under the curve  
87 (AUC) was then calculated by GraphPad Prism 7, where after these were combined into a bar  
88 chart.

## 89 **Results**

90 Initially, a wide range of concentrations of all investigated compounds was used to estimate  
91 the concentration of the compounds at which these inhibit replication of the amoeba. Next, a  
92 smaller range of concentrations was used, of which the effect on replication was examined by  
93 growth curve analysis through AUC calculation. The results are shown in Figure 1. Addition  
94 of VPA resulted in inhibition of growth in a concentration dependent manner (Fig. 1A).  
95 Addition of PHX resulted in an inhibition of about 50% in most concentrations (Fig. 1B).  
96 ETO addition resulted in clear inhibition at concentrations above 600  $\mu$ M (Fig. 1C), ORL  
97 inhibited circa 50% of growth in all tested concentrations (Fig. 1D), TDZ inhibited growth in  
98 a concentration dependent manner (Fig. 1E). AMB was very effective at inhibiting growth,  
99 inhibiting circa 75 % at concentrations of 0.2  $\mu$ M and higher (Fig. 1F). Addition of MIL  
100 resulted in inhibition in a concentration dependent manner with efficient inhibition of growth  
101 at 80  $\mu$ M (Fig. 1G). As can be seen in Figure 1 in the bars above the individual graphs, there  
102 was a difference in the capacity for regrowth after exposure to the different compounds.  
103 Amoeba incubated with all concentrations of VPA and ORL showed regrowth for all  
104 concentrations used, while PHX consistently prevented regrowth at concentrations  $\geq$  90  $\mu$ M.  
105 TDZ showed little regrowth at 40  $\mu$ M concentrations, while ETO showed little regrowth in  
106 concentrations over 600  $\mu$ M. MIL showed regrowth in concentrations below 80  $\mu$ M and

107 inconsistently blocked regrowth at concentrations over 80  $\mu\text{M}$ . AMB was most effective in  
108 preventing regrowth, always blocking regrowth at concentrations of 0.4  $\mu\text{M}$  or higher.

109         Next, compounds were combined to assess whether FAO inhibitors could be a  
110 promising addition to the current treatment and to ascertain whether combinations of lower  
111 concentrations of FAO inhibitors could enhance the effect of those compounds on their own.  
112 For these experiments, VPA, PHX, MIL, ETO, TDZ and ORL concentrations were used  
113 which inhibited 50% of growth when used as a single drug. For AMB 0.2  $\mu\text{M}$  was used, as  
114 this strongly inhibited growth, but did not kill the amoeba at this concentration. We  
115 investigated whether addition of FAO inhibitors could establish killing. Combinations with  
116 MIL did not show additive effects when combined with FAO inhibitors or AMB (results not  
117 shown). However, an additive effect over the first 5 days was observed when VPA was  
118 combined with any of the other FAO inhibitors, as can be seen in Figure 2. VPA alone in a  
119 concentration of 700  $\mu\text{M}$  resulted in circa 50 % inhibition of growth, while combining this  
120 drug concentration with 50  $\mu\text{M}$  ORL or 60  $\mu\text{M}$  PHX resulted in 75 % inhibition of growth.  
121 Combining 700  $\mu\text{M}$  VPA with 600  $\mu\text{M}$  ETO or 10  $\mu\text{M}$  TDZ resulted in an even stronger  
122 reduction of growth. However, when the compounds were washed away after 5 days,  
123 regrowth was still observed in all combinations. Combinations of the other FAO inhibitors  
124 resulted in some, but not evident additive effects on growth during the first 5 days (Fig. S1 A-  
125 F).

126         Combinations of drugs were also assessed for their capacity to block regrowth. When  
127 used separately, none of the compounds used in concentrations in the combination  
128 experiments prevented regrowth of the amoeba. However, regrowth was blocked when AMB  
129 was combined with ETO or PHX as can be seen in Figure 3 A-B. When AMB was combined  
130 with VPA, regrowth capacity was reduced substantially (Fig. 3C). To assess viability of the  
131 amoeba, pictures were recorded at day 0, 5 and pictures and movies were recorded at day 14,

132 which is 9 days after removal of the drugs (supplementary material). At day 5 after washing,  
133 only active trophozoites were seen in the wells with a single drug exposure (Fig S2 A-D). In  
134 contrast, only rounded immobile amoeba were visible in the wells with AMB + ETO and  
135 AMB + PHX (Fig. S3 A-B). We noticed one single trophozoite besides the many rounded  
136 amoeba in the wells with AMB + VPA (Fig. S3 C). At day 14 the amoeba incubated with  
137 AMB + ETO, AMB + PHX or AMB + VPA showed only rounded and disfigured amoeba  
138 (Fig. S4 A-C). No visible processes such as movement or vacuolar transport could be detected  
139 (See movies S1-4), strongly suggesting that the amoeba that did not regrow were killed by the  
140 treatment. In contrast, when compounds were used separately, removal of the inhibitor  
141 resulted in dense growth with a mixture of trophozoites and cysts (Fig. S5 A-D).

## 142 **Discussion**

143 Our study showed that FAO inhibitors clearly inhibited growth of *N. gruberi in vitro*. Even  
144 more, FAO inhibitor PHX killed the amoeba in concentrations  $\geq 90 \mu\text{M}$ . Hence, lipids are not  
145 only the preferred food source for *N. gruberi*, but oxidation of fatty acids also seems to be  
146 essential for growth. The current treatment of Miltefosine and Amphotericin B was also  
147 shown to be effective in inhibiting growth, which is in agreement with previous reports (17-  
148 19) and validates our high through-put assay to detect compounds that inhibit growth of *N.*  
149 *gruberi*.

150 It is notoriously hard to determine whether *Naegleria* cysts are viable or not, because  
151 their energy metabolism can be too low to detect, and because their shell is impenetrable for  
152 metabolic staining. Therefore, we approached this problem in another way, by giving the  
153 amoeba the opportunity to regrow in a nutrient-rich environment (PYNFH) after removal of  
154 inhibitory compounds by successive washes. Subsequently, growth of amoeba was followed  
155 up to nine days after washing, after which the ability for regrowth was assessed. Of course, it  
156 cannot be concluded that amoebae that did not show regrowth were definitely killed, but the

157 chances that amoebae that did not show growth after nine days in such a nutrient-rich  
158 environment will be viable and replicate in another environment are very slim.

159 The investigated FAO inhibitors affect different enzymes involved in lipid  
160 metabolism. Thioridazine (TDZ) inhibits peroxisomal oxidation of lipids (20, 21). Orlistat  
161 (ORL) inhibits lipases, enzymes that hydrolyse triacylglycerol, thereby obstructing the first  
162 step in the breakdown of lipids (22). Etomoxir (ETO) and perhexiline (PHX) inhibit the  
163 carnitine palmitoyltransferase-1 (CPT-1), blocking transport of fatty acids into mitochondria  
164 (23, 24). Among other activities, valproic acid (VPA) interferes mainly with mitochondrial  $\beta$ -  
165 oxidation (25). All these compounds inhibited amoebal growth at various concentrations on  
166 their own, but relatively high concentrations were required. However, when compounds were  
167 combined, more potent effects were observed. Over the first five days, a clear additive effect  
168 was observed when VPA was combined with TDZ, ORL, PHX and ETO. There was also a  
169 tendency for enhanced activity when ORL was combined with ETO and TDZ. These results  
170 show that when multiple enzymes in lipid catabolism are blocked, this can result in enhanced  
171 efficacy of the compounds. Furthermore, when PHX, ETO and VPA were combined with  
172 AMB, regrowth of amoeba was prevented, showing that inhibition of the fatty acid oxidation  
173 pathway can be a valuable addition to the current treatment regimen.

174 VPA is one of the oldest anticonvulsants available, present in the WHO list of  
175 Essential Medicines and is therefore widely available and used across the world (26, 27).  
176 When VPA is prescribed in a conventional dosing regimen in children and adolescents, the  
177 maximum concentrations observed in blood can go up to 900  $\mu\text{M}$  without major side-effects  
178 (28). We have shown here that VPA can inhibit 50 % growth at concentrations around 700  
179  $\mu\text{M}$ , making it a promising new complementary drug for the treatment of PAM. Possible  
180 additional evidence for the efficacy of VPA can be deduced from a described case of a 62-  
181 year old male with seizures and a positive PCR result for *N. fowleri* on CSF and brain



182 material. This patient received VPA as a treatment for his seizures and survived, while not  
183 receiving any antiparasitic drugs for the amoebal infection (29). TDZ has been in use as an  
184 antipsychotic drug since the early 1950s and is now being repurposed as an anti-cancer, anti-  
185 inflammatory and antimicrobial agent (30-32). TDZ has been shown to accumulate in brain  
186 tissue of chronically treated patients, resulting in concentrations 10-fold higher than that in  
187 serum (33). This is in contrast with AMB and MIL, known to be present in very low  
188 concentrations in the brain, which could possibly explain the poor prospects for treatment of  
189 patients with PAM (34, 35). In a recent clinical study, the sum of TDZ and its metabolites in  
190 serum approached 10  $\mu$ M (32). Since 10  $\mu$ M TDZ substantially inhibited growth of the  
191 amoeba *in vitro*, our results suggest that TDZ is also a promising new drug to treat PAM.  
192 Although QTc prolongation can be a side-effect of TDZ, this can be monitored and controlled  
193 in a clinical setting. As shown by our results, the addition of both VPA and TDZ resulted in  
194 synergistic effects, highlighting the promising nature of combinations of these drugs to treat  
195 PAM.

196 *N. gruberi* is a non-pathogenic relative of *N. fowleri* and genomic analysis has shown  
197 that its metabolic machinery is highly similar to that of *N. fowleri* (14-16). Therefore, the  
198 observations in our *N. gruberi* model indicate that inhibition of fatty acid oxidation as a new  
199 treatment strategy for PAM seems promising. Such a treatment could be directly applied  
200 through the repurposing of existing drugs. Development and testing of new drugs for this  
201 neglected disease is very difficult, as randomized controlled trials for the treatment of PAM  
202 are impossible due to the rapidly fatal nature of the disease and its relatively rare occurrence.  
203 It can be argued that if there is evidence that (1) a drug is effective in concentrations  
204 attainable in the human body, (2) has few side-effects and (3) is effective against one of the  
205 symptoms of PAM, this warrants direct clinical application. Therefore, we propose that if a  
206 patient with PAM is experiencing seizures, VPA should be the drug of choice due to the

207 additional inhibiting effects on growth of the amoeba shown in this study. Even more, the  
208 combination of the two well-known drugs VPA and TDZ can be a valuable addition to the  
209 currently recommended treatment.

## 210 **References**

- 211 1. **Cope JR, Ali IK.** 2016. Primary Amebic Meningoencephalitis: What Have We Learned in the  
212 Last 5 Years? *Curr Infect Dis Rep* **18**:31.
- 213 2. **Grace E, Asbill S, Virga K.** 2015. *Naegleria fowleri*: pathogenesis, diagnosis, and treatment  
214 options. *Antimicrob Agents Chemother* **59**:6677-6681.
- 215 3. **Siddiqui R, Ali IKM, Cope JR, Khan NA.** 2016. Biology and pathogenesis of *Naegleria*  
216 *fowleri*. *Acta Trop* **164**:375-394.
- 217 4. **De Jonckheere JF.** 2011. Origin and evolution of the worldwide distributed pathogenic  
218 amoeboflagellate *Naegleria fowleri*. *Infect Genet Evol* **11**:1520-1528.
- 219 5. **Cope JR, Murphy J, Kahler A, Gorbett DG, Ali I, Taylor B, Corbitt L, Roy S, Lee N,**  
220 **Roellig D, Brewer S, Hill VR.** 2018. Primary Amebic Meningoencephalitis Associated With  
221 Rafting on an Artificial Whitewater River: Case Report and Environmental Investigation. *Clin*  
222 *Infect Dis* **66**:548-553.
- 223 6. **Stowe RC, Pehlivan D, Friederich KE, Lopez MA, DiCarlo SM, Boerwinkle VL.** 2017.  
224 Primary Amebic Meningoencephalitis in Children: A Report of Two Fatal Cases and Review  
225 of the Literature. *Pediatr Neurol* **70**:75-79.
- 226 7. **Jarolim KL, McCosh JK, Howard MJ, John DT.** 2000. A light microscopy study of the  
227 migration of *Naegleria fowleri* from the nasal submucosa to the central nervous system during  
228 the early stage of primary amebic meningoencephalitis in mice. *J Parasitol* **86**:50-55.
- 229 8. **Kemble SK, Lynfield R, DeVries AS, Drehner DM, Pomputius WF, 3rd, Beach MJ,**  
230 **Visvesvara GS, da Silva AJ, Hill VR, Yoder JS, Xiao L, Smith KE, Danila R.** 2012. Fatal  
231 *Naegleria fowleri* infection acquired in Minnesota: possible expanded range of a deadly  
232 thermophilic organism. *Clin Infect Dis* **54**:805-809.

- 233 9. **Shakoor S, Beg MA, Mahmood SF, Bandea R, Sriram R, Noman F, Ali F, Visvesvara**  
234 **GS, Zafar A.** 2011. Primary amebic meningoencephalitis caused by *Naegleria fowleri*,  
235 Karachi, Pakistan. *Emerg Infect Dis* **17**:258-261.
- 236 10. **Martinez-Castillo M, Cardenas-Zuniga R, Coronado-Velazquez D, Debnath A, Serrano-**  
237 **Luna J, Shibayama M.** 2016. *Naegleria fowleri* after 50 Years: Is it a neglected pathogen? *J*  
238 *Med Microbiol.*
- 239 11. **Fidock DA, Rosenthal PJ, Croft SL, Brun R, Nwaka S.** 2004. Antimalarial drug discovery:  
240 efficacy models for compound screening. *Nature Reviews Drug Discovery* **3**:509.
- 241 12. **Horn D, Duraisingh MT.** 2014. Antiparasitic chemotherapy: from genomes to mechanisms.  
242 *Annu Rev Pharmacol Toxicol* **54**:71-94.
- 243 13. **Shakya A, Bhat HR, Ghosh SK.** 2018. Update on Nitazoxanide: A Multifunctional  
244 Chemotherapeutic Agent. *Curr Drug Discov Technol* **15**:201-213.
- 245 14. **Bexkens ML, Zimorski V, Sarink MJ, Wienk H, Brouwers JF, De Jonckheere JF,**  
246 **Martin WF, Opperdoes FR, van Hellemond JJ, Tielens AGM.** 2018. Lipids Are the  
247 Preferred Substrate of the Protist *Naegleria gruberi*, Relative of a Human Brain Pathogen. *Cell*  
248 *Rep* **25**:537-543 e533.
- 249 15. **Opperdoes FR, De Jonckheere JF, Tielens AG.** 2011. *Naegleria gruberi* metabolism. *Int J*  
250 *Parasitol* **41**:915-924.
- 251 16. **Fritz-Laylin LK, Prochnik SE, Ginger ML, Dacks JB, Carpenter ML, Field MC, Kuo A,**  
252 **Paredez A, Chapman J, Pham J, Shu S, Neupane R, Cipriano M, Mancuso J, Tu H,**  
253 **Salamov A, Lindquist E, Shapiro H, Lucas S, Grigoriev IV, Cande WZ, Fulton C,**  
254 **Rokhsar DS, Dawson SC.** 2010. The genome of *Naegleria gruberi* illuminates early  
255 eukaryotic versatility. *Cell* **140**:631-642.
- 256 17. **Debnath A, Tunac JB, Galindo-Gomez S, Silva-Olivares A, Shibayama M, McKerrow**  
257 **JH.** 2012. Corifungin, a new drug lead against *Naegleria*, identified from a high-throughput  
258 screen. *Antimicrob Agents Chemother* **56**:5450-5457.

- 259 18. **Kim JH, Jung SY, Lee YJ, Song KJ, Kwon D, Kim K, Park S, Im KI, Shin HJ.** 2008.  
260 Effect of therapeutic chemical agents in vitro and on experimental meningoencephalitis due to  
261 Naegleria fowleri. *Antimicrob Agents Chemother* **52**:4010-4016.
- 262 19. **Colon BL, Rice CA, Guy RK, Kyle DE.** 2018. Phenotypic Screens Reveal Posaconazole as a  
263 Rapidly Acting Amebicidal Combination Partner for Treatment of Primary Amoebic  
264 Meningoencephalitis. *The Journal of Infectious Diseases*:jiy622-jiy622.
- 265 20. **Shi R, Zhang Y, Shi Y, Shi S, Jiang L.** 2012. Inhibition of peroxisomal beta-oxidation by  
266 thioridazine increases the amount of VLCFAs and Aβ generation in the rat brain. *Neurosci*  
267 *Lett* **528**:6-10.
- 268 21. **Van den Branden C, Roels F.** 1985. Thioridazine: a selective inhibitor of peroxisomal beta-  
269 oxidation in vivo. *FEBS Lett* **187**:331-333.
- 270 22. **Hadvary P, Lengsfeld H, Wolfer H.** 1988. Inhibition of pancreatic lipase in vitro by the  
271 covalent inhibitor tetrahydrolipstatin. *Biochem J* **256**:357-361.
- 272 23. **Kennedy JA, Unger SA, Horowitz JD.** 1996. Inhibition of carnitine palmitoyltransferase-1  
273 in rat heart and liver by perhexiline and amiodarone. *Biochem Pharmacol* **52**:273-280.
- 274 24. **Weis BC, Cowan AT, Brown N, Foster DW, McGarry JD.** 1994. Use of a selective  
275 inhibitor of liver carnitine palmitoyltransferase I (CPT I) allows quantification of its  
276 contribution to total CPT I activity in rat heart. Evidence that the dominant cardiac CPT I  
277 isoform is identical to the skeletal muscle enzyme. *J Biol Chem* **269**:26443-26448.
- 278 25. **Silva MF, Aires CC, Luis PB, Ruiter JP, L IJ, Duran M, Wanders RJ, Tavares de**  
279 **Almeida I.** 2008. Valproic acid metabolism and its effects on mitochondrial fatty acid  
280 oxidation: a review. *J Inherit Metab Dis* **31**:205-216.
- 281 26. **World Health Organisation.** 2017. WHO model list of essential medicines (20th list).  
282 [http://www.who.int/medicines/publications/essentialmedicines/20th\\_EML2017.pdf?ua=1](http://www.who.int/medicines/publications/essentialmedicines/20th_EML2017.pdf?ua=1).
- 283 27. **Johannessen CU, Johannessen SI.** 2003. Valproate: past, present, and future. *CNS Drug Rev*  
284 **9**:199-216.

- 285 28. **Dutta S, Zhang Y, Conway JM, Sallee FR, Biton V, Reed MD, Kearns GL.** 2004.  
286 Divalproex-ER pharmacokinetics in older children and adolescents. *Pediatr Neurol* **30**:330-  
287 337.
- 288 29. **Rodriguez Alvarez M, Mirchandani N, Khan I, Medin K, Seidman R, Madison-**  
289 **Antenucci S, Espina N, Teal A, Mergen K.** 2015. A unique case of leptomeningitis  
290 associated with rheumatoid-like arthritis and naegleria fowleri. (P6.316). *Neurology* **84**.
- 291 30. **Baig MS, Roy A, Saqib U, Rajpoot S, Srivastava M, Naim A, Liu D, Saluja R, Faisal SM,**  
292 **Pan Q, Turkowski K, Darwhekar GN, Savai R.** 2018. Repurposing Thioridazine (TDZ) as  
293 an anti-inflammatory agent. *Sci Rep* **8**:12471.
- 294 31. **Wassmann CS, Lund LC, Thorsing M, Lauritzen SP, Kolmos HJ, Kallipolitis BH,**  
295 **Klitgaard JK.** 2018. Molecular mechanisms of thioridazine resistance in *Staphylococcus*  
296 *aureus*. *PLoS One* **13**:e0201767.
- 297 32. **Aslostovar L, Boyd AL, Almakadi M, Collins TJ, Leong DP, Tirona RG, Kim RB, Julian**  
298 **JA, Xenocostas A, Leber B, Levine MN, Foley R, Bhatia M.** 2018. A phase 1 trial  
299 evaluating thioridazine in combination with cytarabine in patients with acute myeloid  
300 leukemia. *Blood Adv* **2**:1935-1945.
- 301 33. **Svensen CN, Hrbek CC, Casendino M, Nichols RD, Bird ED.** 1988. Concentration and  
302 distribution of thioridazine and metabolites in schizophrenic post-mortem brain tissue.  
303 *Psychiatry Res* **23**:1-10.
- 304 34. **Nau R, Sorgel F, Eiffert H.** 2010. Penetration of drugs through the blood-cerebrospinal  
305 fluid/blood-brain barrier for treatment of central nervous system infections. *Clin Microbiol*  
306 *Rev* **23**:858-883.
- 307 35. **Roy SL, Atkins JT, Gennuso R, Kofos D, Sriram RR, Dorlo TP, Hayes T, Qvarnstrom Y,**  
308 **Kucerova Z, Guglielmo BJ, Visvesvara GS.** 2015. Assessment of blood-brain barrier  
309 penetration of miltefosine used to treat a fatal case of granulomatous amebic encephalitis  
310 possibly caused by an unusual *Balamuthia mandrillaris* strain. *Parasitol Res* **114**:4431-4439.

312 Legends:

313 Figure 1:

314 Growth curves of *Naegleria gruberi* were obtained in the presence or absence of inhibitors of  
315 fatty acid oxidation or drugs currently used to treat primary amoebic meningitis. Shown is the  
316 Area Under the growth Curve (AUC) of compounds and respective controls over a 5-day  
317 period. Indicated are lines of 100 % and 50 % of the control AUC. On top of the graph the  
318 capacity for regrowth is shown. + : clear regrowth; +/- : inconsistent or little regrowth; - :  
319 never any regrowth. Error bars are SD.

320 Figure 2:

321 Growth curves of *Naegleria gruberi* were obtained in the presence or absence of valproic acid  
322 (VPA), orlistat (ORL), perhexiline (PHX), etomoxir (ETO), thioridazine (TDZ) and  
323 combinations of these compounds. Shown is the Area Under the growth Curve (AUC) of  
324 compounds and respective controls over a 5-day period. Indicated are lines of 100 %, 50 %  
325 and 25 % of the control AUC. Error bars are SD.

326 Figure 3:

327 Growth curves of *Naegleria gruberi* in the presence or absence of amphotericin B 0.2  $\mu$ M  
328 (AMB), etomoxir 600  $\mu$ M (ETO), perhexiline 60  $\mu$ M (PHX) and valproic acid 700  $\mu$ M (VPA)  
329 and in combinations of these compounds. At day 5, well contents were collected and washed  
330 thrice with PYNFH to remove the inhibitors, after which the samples were added to a new  
331 plate. The control was diluted 10 times to allow proper detection of regrowth. Shown is a  
332 representative example of two independent duplicate experiments, each performed in  
333 triplicate.

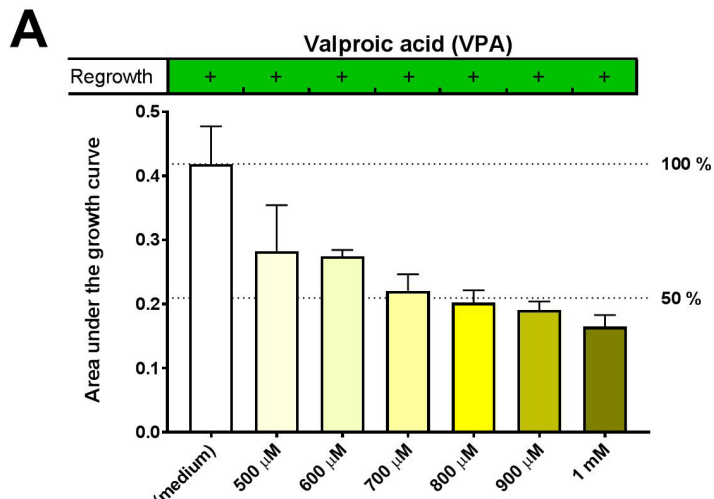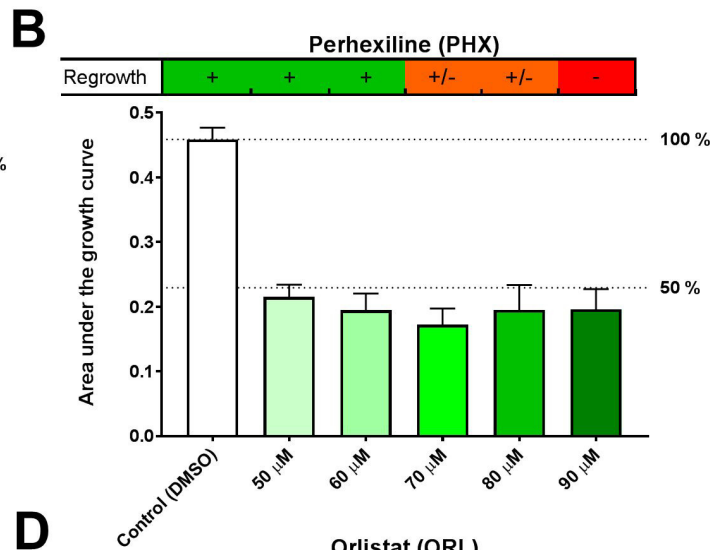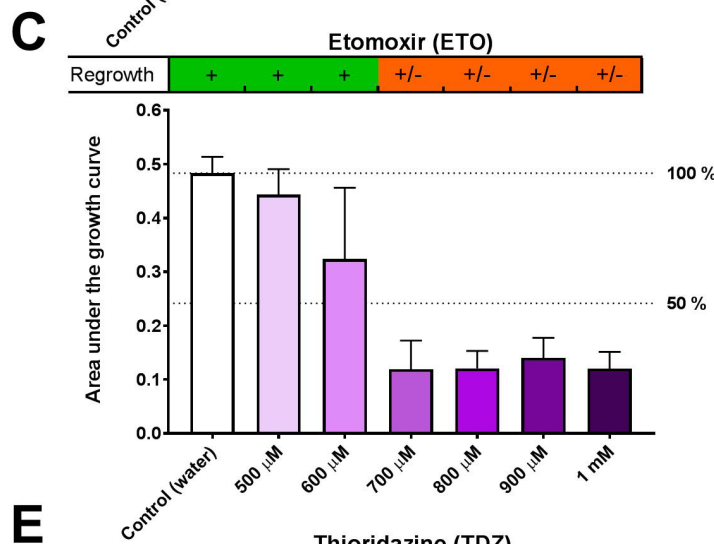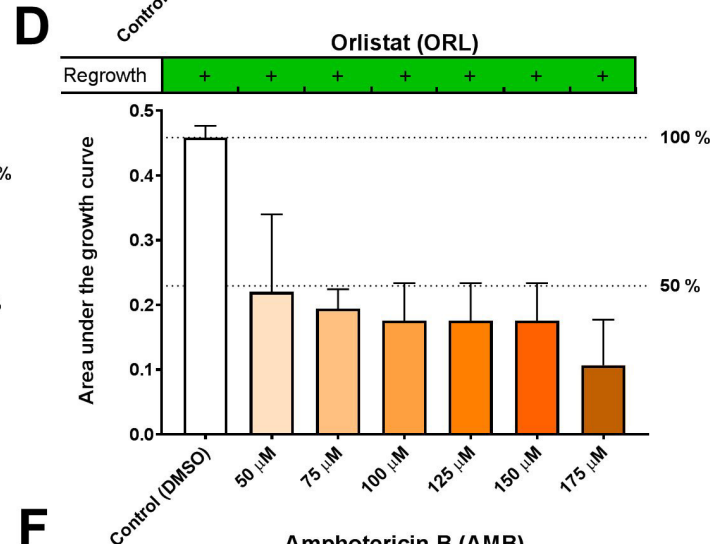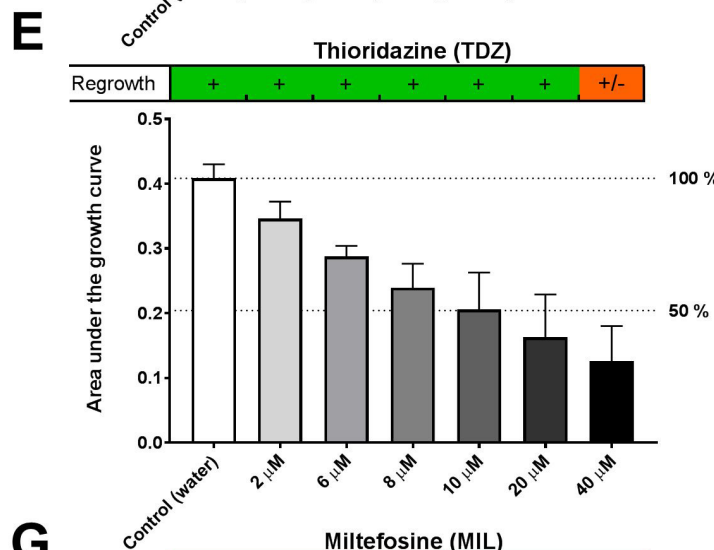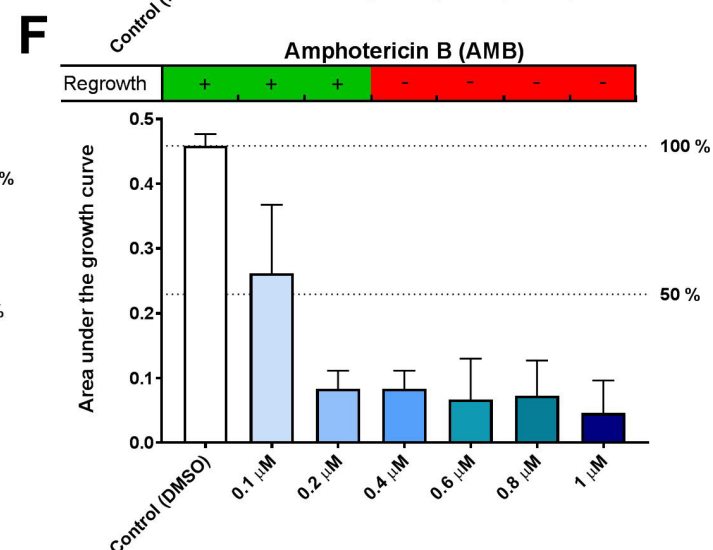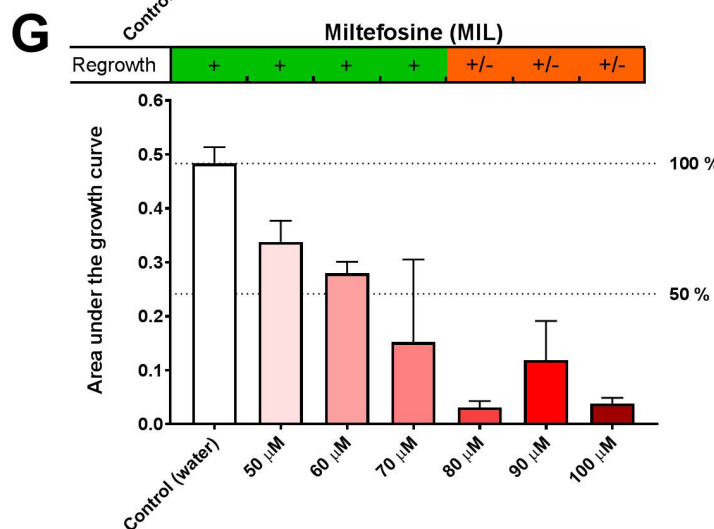

**A**

## Valproic acid + Orlistat

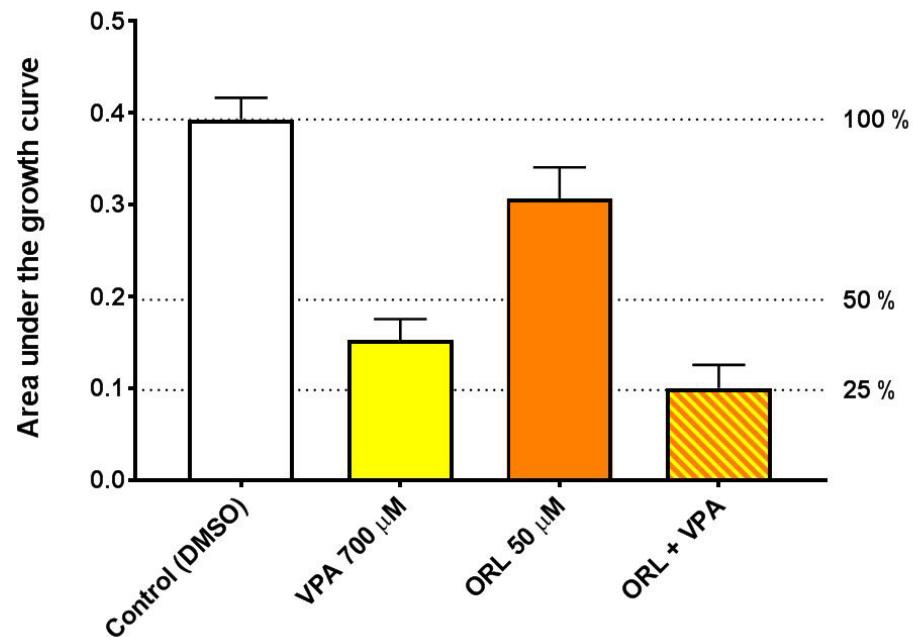**B**

## Valproic acid + Perhexiline

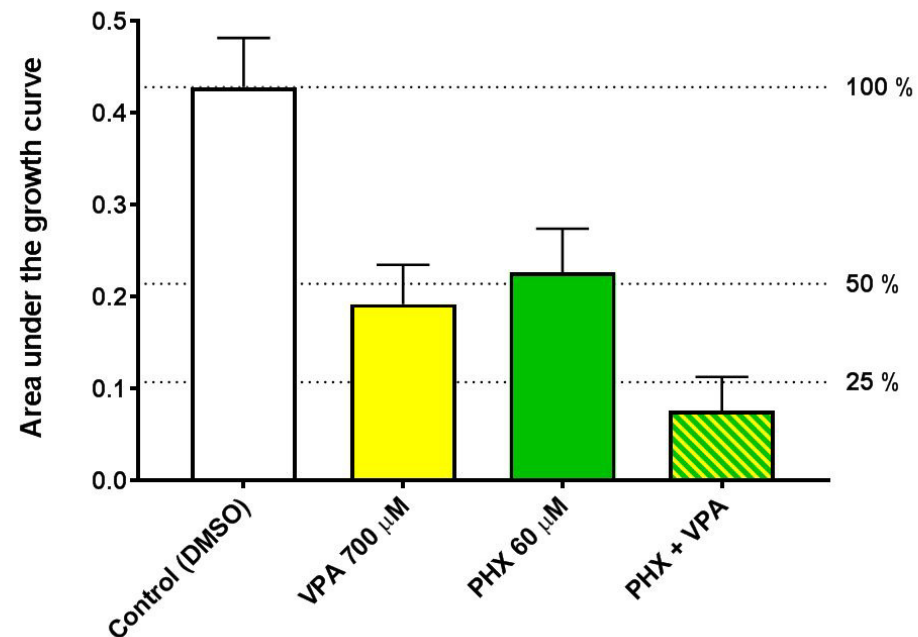**C**

## Valproic acid + Etomoxir

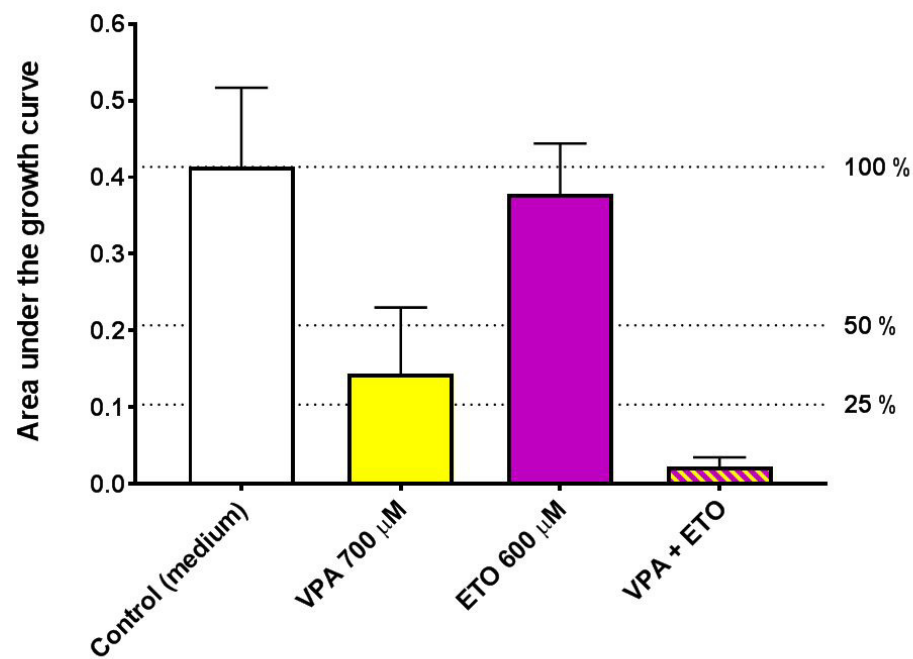**D**

## Valproic acid + Thioridazine

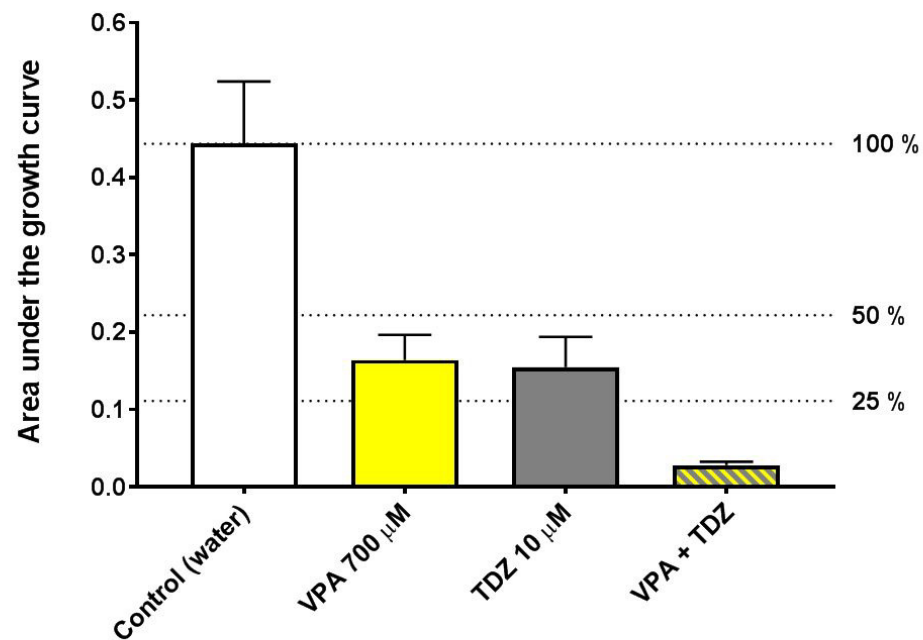



# A Amphotericin B + Etomoxir

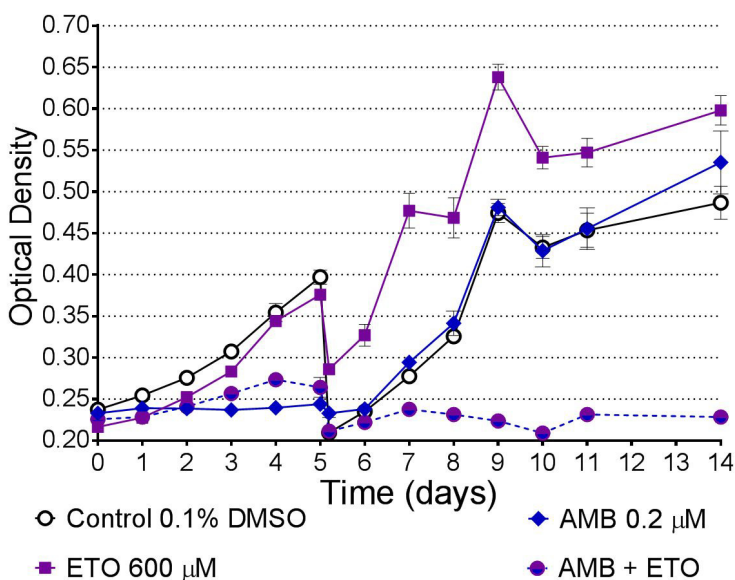

# B Amphotericin B + Perhexiline

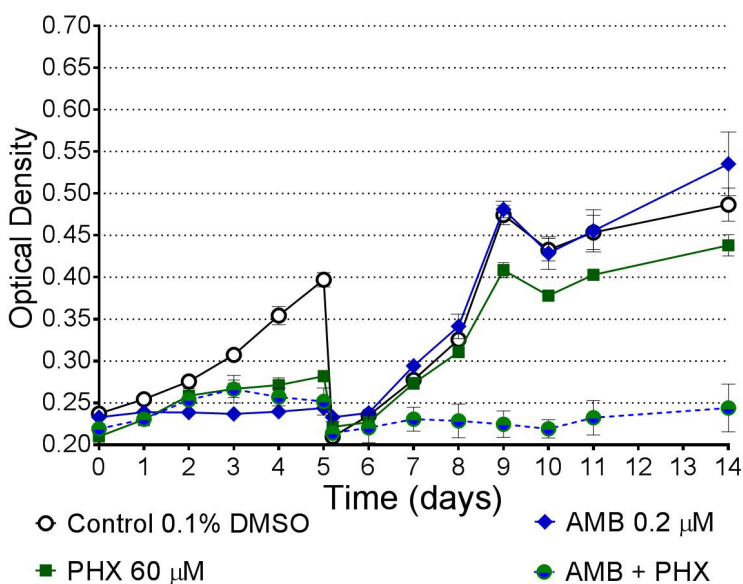

# C Amphotericin B + Valproic acid

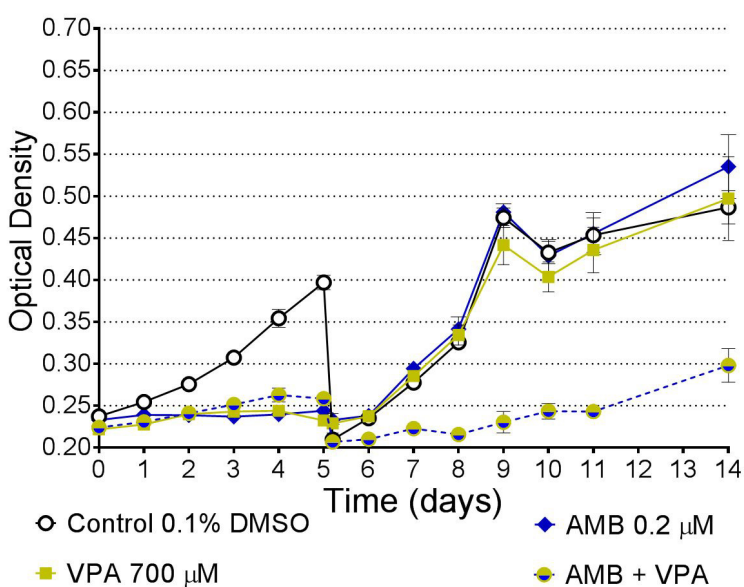

Source: http://biorxiv.org/content/10.1101/650325v1.full.pdf
